# Supplementary material for: Scaling production of GFP1-10 detector protein in E. coli for secretion screening by split GFP assay
Source: PubMed Central journal article supplement (PMC8482599; doi:10.1186/s12934-021-01672-6), 2021-09-30
Supplement: 12934_2021_1672_MOESM1_ESM.pdf [file 12934_2021_1672_MOESM1_ESM.pdf]

# Additional File 1

## Supplementary Figures

Müller et al. 2021

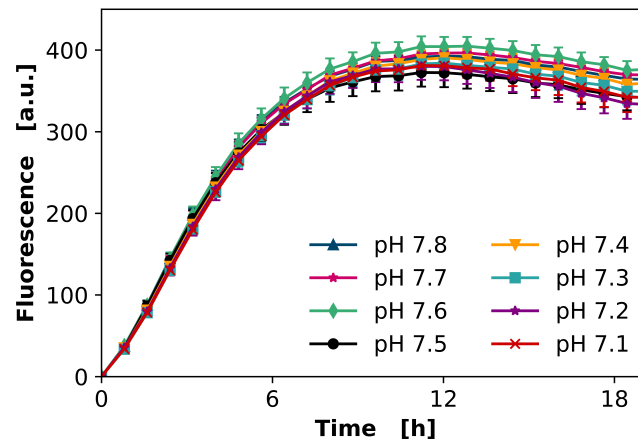

**Figure S1: Impact of supernatant pH on split GFP assay.** Original pH of *C. glutamicum* pPBEx2-NprE-Cutinase-GFP11 supernatant containing cutinase-GFP11 was 7.5. Acid (10 M HCl) or base (8 M NaOH) was added to change pH of supernatant to 7.1–7.8 before split GFP assay. Data is shown as mean of three technical replicates with standard deviation.

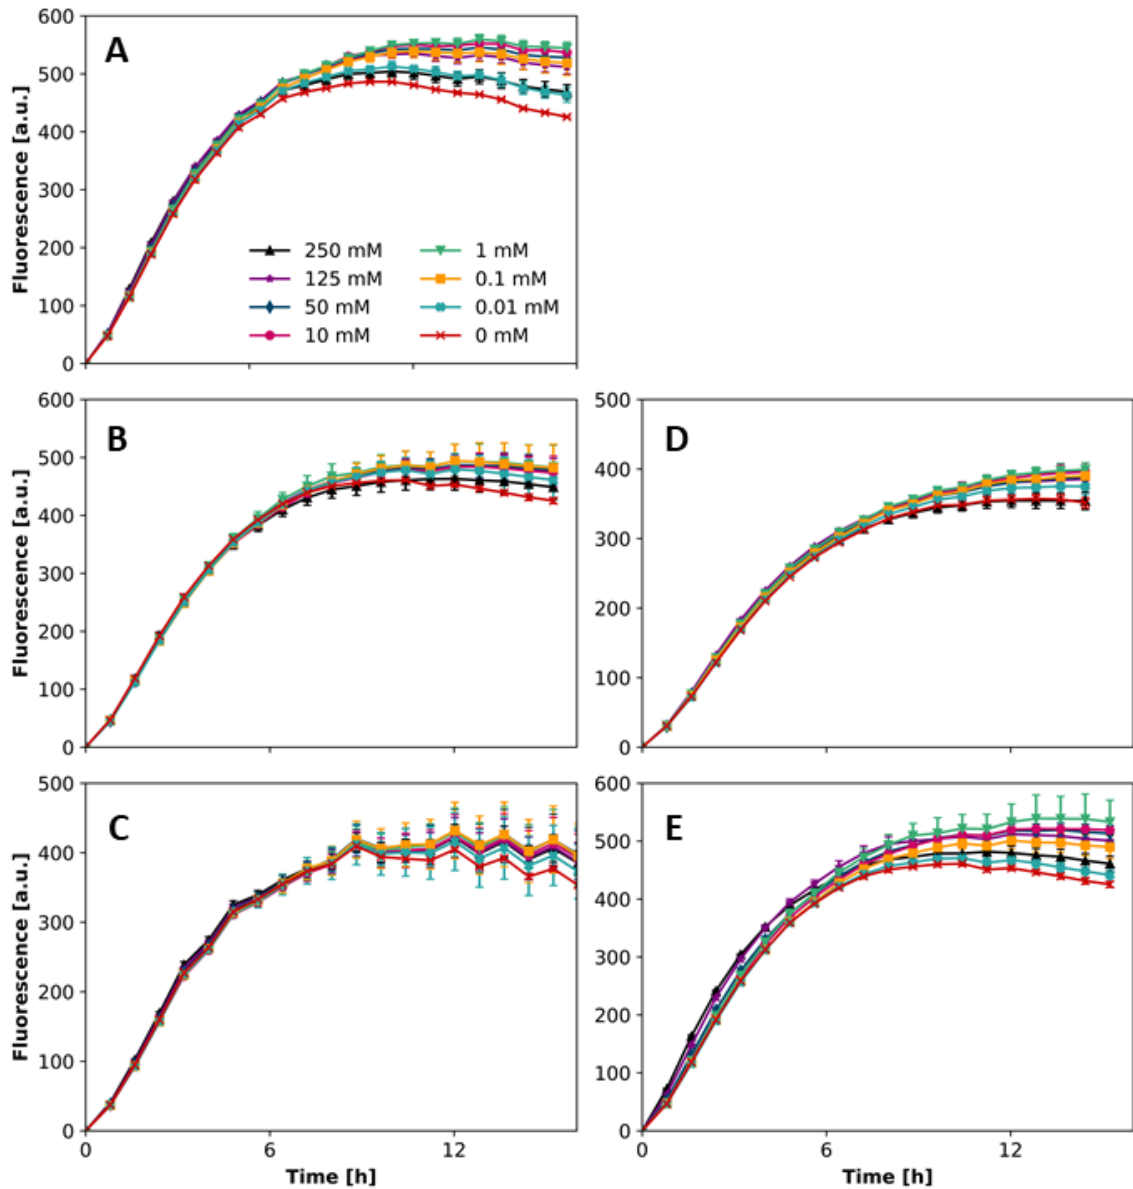

**Figure S2: Impact of different metabolites in *C. glutamicum* supernatant on split GFP assay.** Succinate (A), lactate (B), glutamate (C), ketoglutarate (D) and acetate (E) were added with final concentrations of 250–0.1 mM to *C. glutamicum* pPBEx2-NprE-Cutinase-GFP11 supernatant containing cutinase-GFP11. Data is shown as mean of three technical replicates with standard deviation.

**Table S1:** Gene sequences of cutinase-GFP11 with *B. subtilis* signal peptides NprE and Pel.

| <b>Gene</b>         | <b>DNA sequence (5' → 3')</b>                                                                                                                                                                                                                                                                                                                                                                                                                                                                                                                                                                                                                                                                                                                                                                                                                                                                                                     |
|---------------------|-----------------------------------------------------------------------------------------------------------------------------------------------------------------------------------------------------------------------------------------------------------------------------------------------------------------------------------------------------------------------------------------------------------------------------------------------------------------------------------------------------------------------------------------------------------------------------------------------------------------------------------------------------------------------------------------------------------------------------------------------------------------------------------------------------------------------------------------------------------------------------------------------------------------------------------|
| NprE-Cutinase-GFP11 | ATGGGTTTAGGTAAGAAATTGTCTGTTGCTGTCGCTGCTTCGTT<br>TATGAGTTTATCAATCAGCCTGCCAGGTGTTGAGGCTGCTGAAT<br>TCGCGCCTACTAGTAACCCTGCTCAGGAGCTTGAGGCGCGCCA<br>GCTTGGTAGAACAACTCGCGACGATCTGATCAACGGCAATAGC<br>GCTTCCTGCGCCGATGTCATCTTCATTTATGCCCGGGTTCAAC<br>AGAGACGGGCAACTTGGGAACTCTCGTCTAGCATTGCCTCC<br>AACCTTGAGTCCGCCTTCGGCAAGGACGGTGTCTGGATTCAGG<br>GCGTTGGCGGTGCCTACCGAGCCACTTTGGAGACAATGCTCT<br>CCCTCGCGGTACCTCTAGCGCCGCAATCAGGGAGATGCTTGGT<br>CTCTTCCAGCAGGCCAACACCAAGTGCCCGACGCGACTTTGA<br>TCGCCGGTGGCTACAGCCAGGGTGCTGCACTTGCGGCCGCCT<br>CCATCGAGGACCTCGACTCGGCCATTCGTGACAAGATCGCCGG<br>AACTGTTCTGTTGCGCTACACCAAGAACCTACAGAACCGTGGC<br>CGAATCCCCAACTACCCTGCCGACAGGACCAAGGTCTTCTGCA<br>ATACAGGAGATCTCGTTTGTACTGGTAGCTTGATCGTTGCTGCA<br>CCTCACTTGGCTTATGGTCCTGATGCTCGGGGCCCTGCCCTG<br>AGTTCCCTCATCGAGAAGGTTTCGGGCTGTCCGTGGTTCTGCTCTT<br>ATCGGCTCTGATGGCGGCTCTGGCGGCGGCTCTACATCTCGTG<br>ATCACATGGTTCTTCATGAATACGTTAACGCTGCTGGCATCACA<br>TAA |
| Pel-Cutinase-GFP11  | ATGAAAAAAGTGATGTTAGCTACGGCTTTGTTTTAGGATTGAC<br>TCCAGCTGGCGCGAACGCAGCTGAATTCGCGCCTACTAGTAAC<br>CCTGCTCAGGAGCTTGAGGCGCGCCAGCTTGGTAGAACAACTC<br>GCGACGATCTGATCAACGGCAATAGCGCTTCCTGCGCCGATGT<br>CATCTTCATTTATGCCCGGGTTCAACAGAGACGGGCAACTTG<br>GAACTCTCGGTCCTAGCATTGCCTCCAACCTTGAGTCCGCCTT<br>CGGCAAGGACGGTGTCTGGATTGAGGGCGTTGGCGGTGCCTA<br>CCGAGCCACTCTTGAGACAATGCTCTCCCTCGCGGTACCTCT<br>AGCGCCGCAATCAGGGAGATGCTTGGTCTCTTCCAGCAGGCCA<br>ACACCAAGTGCCCCGACGCGACTTTGATCGCCGGTGGCTACAG<br>CCAGGGTGCTGCACTTGCGGCCGCCTCCATCGAGGACCTCGAC<br>TCGGCCATTCGTGACAAGATCGCCGGAAGTCTGTTCTGTTGCGCT<br>ACACCAAGAACCTACAGAACCGTGGCCGAATCCCCAACTACCC<br>TGCCGACAGGACCAAGGTCTTCTGCAATACAGGAGATCTCGTT<br>TGTAAGGTTAGCTTGATCGTTGCTGCACCTCACTTGGCTTATGG<br>TCCTGATGCTCGGGGCCCTGCCCTGAGTTCCTCATCGAGAAG<br>GTTTCGGGCTGTCCGTGGTTCTGCTCTTATCGGCTCTGATGGCG<br>GCTCTGGCGGCGGCTCTACATCTCGTGATCACATGGTTCTTCAT<br>GAATACGTTAACGCTGCTGGCATCACATAA                     |
